# Supplementary material
Source: PubMed Central journal article supplement (PMC4895369)
Supplement: JVIM-29-1088-s002.pdf [file JVIM-29-1088-s002.pdf]

**Supplementary Table 1.** Primer sequences for qRT-PCR

| <b>Gene</b>  | <b>Forward Primer</b>             |
|--------------|-----------------------------------|
| <b>S1P1</b>  | 5'-GAG CCG AGT ACT TCC TGG TG-3'  |
| <b>SK1</b>   | 5'-GTG TAT GTG CCT GTG GTT GC-3'  |
| <b>GADPH</b> | 5'-GGA GTC CAC TGG CGT CTT CAC-3' |

2

---

**Reverse Primer**

---

5'-ACT TAC TGC GGC TGA ACT CC-3'

5'-AGG GCT CTT CTG GAG ATG GT-3'

5'-GAG GCA TTG CTG ATG ATC TTG AGG-3'

---
