# Supplementary material
Source: PubMed Central journal article supplement (PMC4895369)
Supplement: JVIM-29-1088-s003.pdf [file JVIM-29-1088-s003.pdf]

**Supplemental Figure 1.** Effect of S1P on cell proliferation in serum-deprived medium. HSA cells (COSB) were plated in triplicate in 96-well plate. The cells remained untreated, or were treated with 5 or 50 ng/ml of exogenous S1P after which they were incubated in serum-deprived conditions for 72 hours. MTS solution was added to cells for 2 hours and absorbance was measured at 490 nm. Cell proliferation rate was normalized to that observed in untreated cells; bar graphs represent the mean increase in proliferation  $\pm$  standard error of the mean (SEM) for each condition. \* =  $P < 0.05$ ; \*\* =  $P < 0.01$
