# Supplementary material
Source: PubMed Central journal article supplement (PMC4895369)

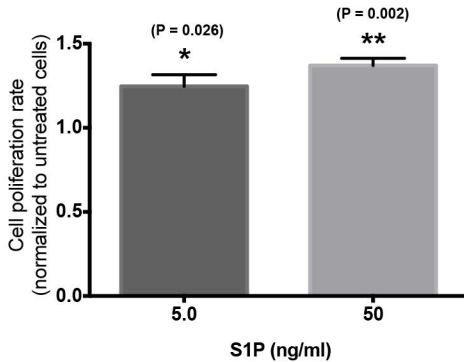

Supplement: JVIM-29-1088-s001.pdf [file JVIM-29-1088-s001.pdf]
